# Supplementary material
Source: HighWire-hosted journal article supplement (https://bibliotheek.ehb.be/content/suppl/2024/05/30/svn-2023-002831)
Supplement: svn-2023-002831supp001_data_supplement.pdf [file svn-2023-002831supp001_data_supplement.pdf]

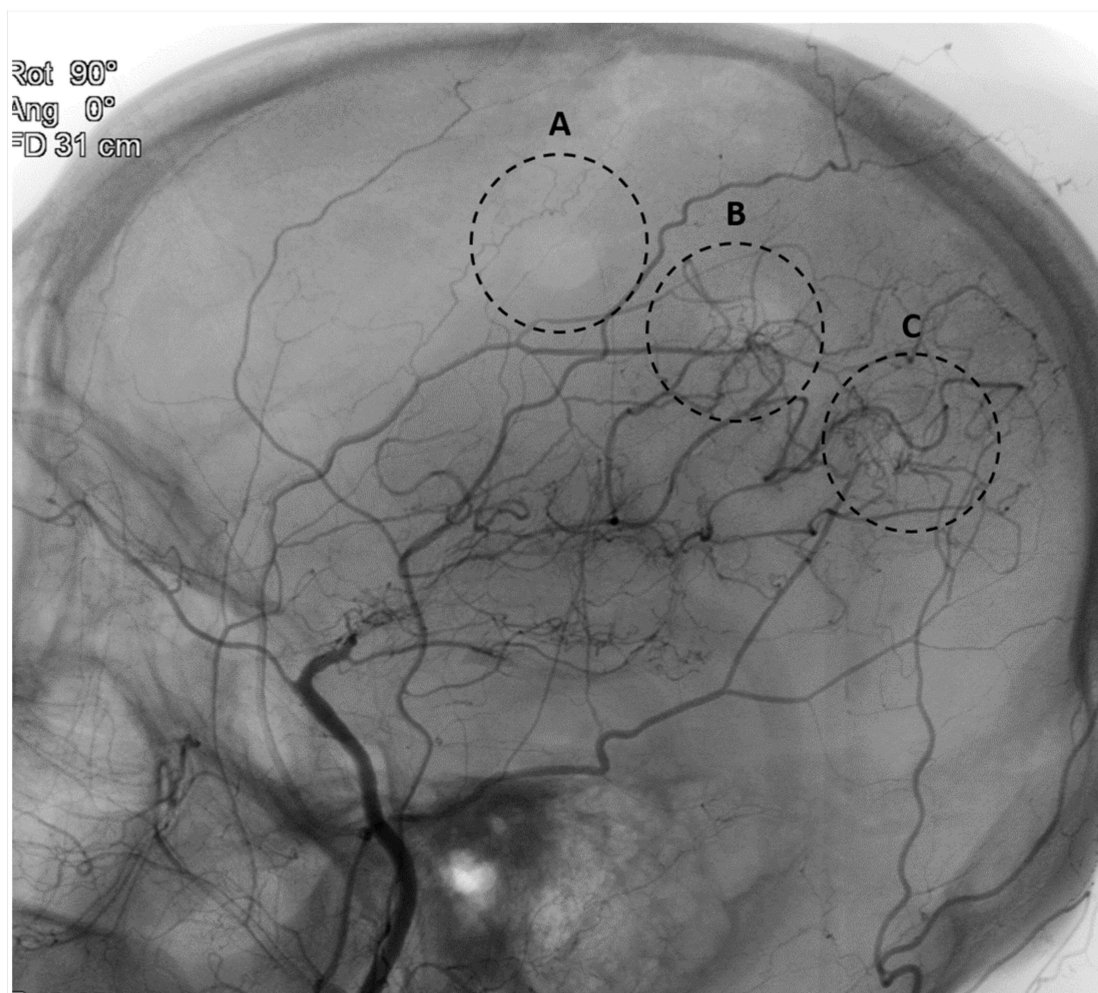

**Supplementary figure 1. A preliminary case with combined therapy illustrates the importance of mechanical barrier disruption of the dural membrane.**

- (A). No revascularization is seen in the transcalvarial burr hole without opening the dura mater.
- (B). Revascularization is documented in the burr hole with disruption of the dura mater.
- (C). Revascularization is documented in the burr hole with disruption of the dura and arachnoid mater.
